# Supplementary material for: Genomic quantitative real-time PCR proves residual disease positivity in more than 30% samples with negative mRNA-based qRT-PCR in Chronic Myeloid Leukemia
Source: PubMed Central journal article supplement (PMC4278316; doi:10.18632/oncoscience.65), 2014-07-23
Supplement: oncoscience-01-0510-s001.pdf [file oncoscience-01-0510-s001.pdf]

## Genomic quantitative real-time PCR proves residual disease positivity in more than 30% samples with negative mRNA-based qRT-PCR in chronic myeloid leukemia

**Supplemental Table S1: Minimal residual disease detected by hematologic analysis, cytogenetic techniques, qRT-PCR based on mRNA and Q-PCR based on gDNA.** Eight CML patients were the object of our study. We monitored minimal residual disease by both hematologic analysis, CBA and I-FISH, and molecular techniques in 8 years of follow-up. Conventional qRT-PCR was performed. The BCR-ABL1/ABL1 ratios were multiplied by the conversion factor of the Bergamo laboratory to set the results on international scale (IS). The same samples were tested by Q-PCR based on genomic DNA. Patient specific Q-PCR assays were developed on the basis of genomic breakpoint and the percentage of leukemic cells was calculated by using the following formula:  $\%LC = (2 / (2^{\Delta Ct} + 1)) * 100$ , where  $\Delta Ct$  is the difference between the amplification cycles of the BCR-ABL1 and BCR reactions. The number of LC was then calculated by multiplying the total number of cells analyzed in each sample for the percentage of LC calculated by the  $\Delta Ct$  formula. Assuming that the content of DNA per cell is 5.7 pg, the total analyzed cell number was calculated by dividing the total of pg of gDNA analyzed in each reaction of real-time by 5.7 pg. The detection of MRD at the limit of sensitivity was indicated as positive (0.001 and +) but not quantified. ND (not determined), NE (not evaluated).

| Pt. 1               |                                                   |                        |                                   | Levels of residual disease (%) |                        | Ph <sup>+</sup> cells detected by DNA Q-PCR |                            |                             |
|---------------------|---------------------------------------------------|------------------------|-----------------------------------|--------------------------------|------------------------|---------------------------------------------|----------------------------|-----------------------------|
| Follow-ups (Months) | White blood cell count (*10 <sup>9</sup> cells/L) | CBA                    | FISH                              | BCR-ABL1/ABL1 mRNA % (IS)      | Leukemic cells DNA (%) | Leukemic cells number                       | Total analyzed cell number | Therapy with Gleevec mg/day |
| 1                   | n.d.                                              | ND                     | ND                                | 89.002                         | 36.173                 | 76154                                       | 210000                     | 400                         |
| 3                   | 3.6                                               |                        |                                   | 2.73                           | 0.077                  | 162                                         | 210000                     | 400                         |
| 7                   | 4.6                                               | normal (20 metaphases) | normal (300 nuclei/15 metaphases) | 0.05                           | 0.004                  | 8                                           | 210000                     | 400                         |
| 30                  | 3.62                                              | normal (22 metaphases) | ND                                | 0.004                          | 0.001                  | +                                           | 421000                     | 400                         |
| 33                  | 3                                                 |                        |                                   | 0                              | 0.001                  | +                                           | 421000                     | 400                         |
| 36                  | 3.69                                              |                        |                                   | 0.025                          | 0.001                  | +                                           | 631000                     | 400                         |
| 38                  | 2,99                                              |                        |                                   | 0                              | 0,001                  | +                                           | 421000                     | 400                         |
| 41                  | 4.08                                              |                        |                                   | 0.003                          | 0.001                  | +                                           | 421000                     | 400                         |
| 50                  | 3.37                                              |                        |                                   | 0                              | 0.001                  | +                                           | 421000                     | 400                         |
| 53                  | 3.74                                              |                        |                                   | 0                              | 0.001                  | +                                           | 631 000                    | 400                         |
| 59                  | 3.76                                              |                        |                                   | 0                              | 0.001                  | +                                           | 526000                     | 400                         |
| 65                  | 3.64                                              |                        |                                   | 0                              | 0.001                  | +                                           | 526000                     | 400                         |
| 71                  | n.d.                                              |                        |                                   | 0                              | 0.001                  | +                                           | 526000                     | 400                         |
| 77                  | n.d.                                              |                        |                                   | 0                              | 0                      | 0                                           | 526000                     | 400                         |
| 85                  | n.d.                                              |                        |                                   | 0                              | 0                      | 0                                           | 526000                     | 400                         |

| Pt. 2               |                                                   | Levels of residual disease (%)          |                                     |                           |                        | Ph <sup>+</sup> cells detected by DNA Q-PCR | Total analyzed cell number | Therapy with Gleevec mg/day |
|---------------------|---------------------------------------------------|-----------------------------------------|-------------------------------------|---------------------------|------------------------|---------------------------------------------|----------------------------|-----------------------------|
| Follow-ups (Months) | White blood cell count (*10 <sup>9</sup> cells/L) | CBA                                     | FISH                                | BCR-ABL1/ABL1 mRNA % (IS) | Leukemic cells DNA (%) | Leukemic cells number                       |                            |                             |
| 0                   | 54.48                                             | 46,XY, t(9;22)(q34;q11) (20 metaphases) | positivity for t(9;22) (300 nuclei) | 100                       | 90.536                 | 190602                                      | 210000                     | 0                           |
| 6                   | 3.66                                              | normal (20 metaphases)                  | normal (300 nuclei)                 | 0.92                      | 0.801                  | 1686                                        | 210000                     | 400                         |
| 15                  | 3.26                                              |                                         |                                     | 0.2                       | 0.079                  | 166                                         | 210000                     | 400                         |
| 18                  | 4.21                                              | normal (22 metaphases)                  | normal (300 nuclei/10 metaphases)   | 0.18                      | 0.061                  | 128                                         | 210000                     | 400                         |
| 21                  | 3.54                                              |                                         |                                     | 0.06                      | 0.027                  | 57                                          | 210000                     | 400                         |
| 39                  | 3.73                                              |                                         |                                     | 0.009                     | 0.013                  | 42                                          | 315000                     | 400                         |
| 42                  | 3.13                                              |                                         |                                     | 0.012                     | 0.011                  | 33                                          | 315000                     | 400                         |
| 45                  | 4                                                 |                                         |                                     | 0                         | 0.001                  | +                                           | 315000                     | 400                         |
| 48                  | 4.12                                              | normal (22 metaphases)                  | normal (300 nuclei/8 metaphases)    | 0.002                     | 0.004                  | 13                                          | 315000                     | 400                         |
| 51                  | 3.7                                               |                                         |                                     | 0                         | 0.001                  | +                                           | 210000                     | 400                         |
| 54                  | 4.2                                               |                                         |                                     | 0                         | 0.001                  | +                                           | 315000                     | 400                         |
| 60                  | 4.47                                              |                                         |                                     | 0                         | 0.001                  | +                                           | 421000                     | 400                         |
| 67                  | 4.62                                              |                                         |                                     | 0                         | 0.001                  | +                                           | 315000                     | 400                         |
| 88                  | n.d.                                              |                                         |                                     | 0                         | 0.001                  | +                                           | 526000                     | 400                         |
| 94                  | n.d.                                              |                                         |                                     | 0                         | 0                      | 0                                           | 526000                     | 400                         |

| Pt. 3               |                                                   | Levels of residual disease (%)                 |                                                         |                           |                        | Ph <sup>+</sup> cells detected by DNA Q-PCR |                            |                             |
|---------------------|---------------------------------------------------|------------------------------------------------|---------------------------------------------------------|---------------------------|------------------------|---------------------------------------------|----------------------------|-----------------------------|
| Follow-ups (Months) | White blood cell count (*10 <sup>9</sup> cells/L) | CBA                                            | FISH                                                    | BCR-ABL1/ABL1 mRNA % (IS) | Leukemic cells DNA (%) | Leukemic cells number                       | Total analyzed cell number | Therapy with Gleevec mg/day |
| 0                   | n.d.                                              | 46,XX, t(9;22;16)(q34;q11;q24) (20 metaphases) | Positivity for BCR/ABL1 (der22 and der 16) (320 nuclei) | 100                       | 60.508                 | 127384                                      | 210000                     | 0                           |
| 3                   | n.d.                                              |                                                |                                                         | 11.006                    | 2.228                  | 4691                                        | 210000                     | 400                         |
| 6                   | 4                                                 | normal (20 metaphases)                         | normal (300 nuclei)                                     | 0.712                     | 0.032                  | 66                                          | 210000                     | 400                         |
| 12                  | 3.35                                              | normal (23 metaphases)                         | normal (300 nuclei/15 metaphases)                       | 0.004                     | 0.016                  | 34                                          | 210000                     | 400                         |
| 15                  | 3.41                                              |                                                |                                                         | 0.811                     | 0.009                  | 19                                          | 210000                     | 400                         |
| 18                  | 3.94                                              | normal (23 metaphases)                         | normal (300 nuclei/15 metaphases)                       | 0.016                     | 0.006                  | 13                                          | 210000                     | 400                         |
| 21                  | 4.14                                              |                                                |                                                         | 0.023                     | 0.005                  | 11                                          | 210000                     | 400                         |
| 27                  | 3.97                                              |                                                |                                                         | 0.011                     | 0.003                  | 6                                           | 210000                     | 400                         |
| 30                  | 2.96                                              | normal (22 metaphases)                         | normal (400 nuclei)                                     | 0                         | 0.002                  | 4                                           | 210000                     | 400                         |
| 42                  | n.d.                                              |                                                |                                                         | 0                         | 0.001                  | +                                           | 210000                     | 400                         |
| 48                  | 3.2                                               | normal (20 metaphases)                         | normal (300 nuclei/10 metaphases)                       | 0                         | 0                      | 0                                           | 210000                     | 400                         |
| 55                  | 4.3                                               |                                                |                                                         | 0.026                     | 0.001                  | +                                           | 210000                     | 400                         |
| 58                  | 3.8                                               |                                                |                                                         | 0                         | 0.001                  | +                                           | 245000                     | 400                         |
| 64                  | 3.5                                               |                                                |                                                         | 0                         | 0.001                  | +                                           | 210000                     | 400                         |
| 76                  | 4.2                                               |                                                |                                                         | 0                         | 0                      | 0                                           | 526000                     | 400                         |
| 82                  | 3.6                                               |                                                |                                                         | 0                         | 0                      | 0                                           | 526000                     | 400                         |
| 89                  | n.d.                                              |                                                |                                                         | 0                         | 0.001                  | +                                           | 1894000                    | 400                         |
| 95                  | n.d.                                              |                                                |                                                         | 0                         | 0                      | 0                                           | 526000                     | 400                         |
| 98                  | n.d.                                              |                                                |                                                         | 0                         | 0                      | 0                                           | 526000                     | 400                         |

| Pt. 4               |                                                   | Levels of residual disease (%)          |                                                                  |                           |                        | Ph <sup>+</sup> cells detected by DNA Q-PCR | Total analyzed cell number | Therapy with Gleevec mg/day |
|---------------------|---------------------------------------------------|-----------------------------------------|------------------------------------------------------------------|---------------------------|------------------------|---------------------------------------------|----------------------------|-----------------------------|
| Follow-ups (Months) | White blood cell count (*10 <sup>9</sup> cells/L) | CBA                                     | FISH                                                             | BCR-ABL1/ABL1 mRNA % (IS) | Leukemic cells DNA (%) | Leukemic cells number                       |                            |                             |
| 0                   | 175                                               | 46,XY, t(9;22)(q34;q11) (20 metaphases) | positivity for t(9;22) (200 nuclei/20 metaphases)+del ABL der(9) | 64.528                    | 90                     | 189473                                      | 210000                     | 0                           |
| 6                   | 6.98                                              | normal (20 metaphases)                  | normal (300 nuclei)                                              | 0.35                      | 0.883                  | 1859                                        | 210000                     | 800                         |
| 12                  | 7.11                                              | normal (24 metaphases)                  | normal (300 nuclei/30 metaphases)                                | 0.23                      | 0.204                  | 429                                         | 210000                     | 800                         |
| 16                  | 8.43                                              |                                         |                                                                  | 0.14                      | 0.128                  | 269                                         | 210000                     | 800                         |
| 20                  | 6.99                                              | normal (21 metaphases)                  | normal (400 nuclei/30 metaphases)                                | 1.06                      | 0.533                  | 1122                                        | 210 000                    | 800                         |
| 22                  | 6.88                                              |                                         |                                                                  | 0.02                      | 0.096                  | 202                                         | 210000                     | 800                         |
| 32                  | 6.49                                              | normal (20 metaphases)                  | normal (300 nuclei/5 metaphases)                                 | 0.26                      | 0.678                  | 1427                                        | 210000                     | 800                         |
| 44                  | 6.91                                              |                                         |                                                                  | 0                         | 0.001                  | +                                           | 315000                     | 800                         |
| 47                  | 7.51                                              |                                         |                                                                  | 0                         | 0.001                  | +                                           | 315000                     | 800                         |
| 58                  | 7.39                                              |                                         |                                                                  | 0                         | 0.001                  | +                                           | 315000                     | 800                         |
| 64                  | 7.13                                              |                                         |                                                                  | 0                         | 0.001                  | +                                           | 315000                     | 800                         |
| 71                  | 6.41                                              |                                         |                                                                  | 0.003                     | 0.001                  | +                                           | 315000                     | 400                         |
| 77                  | 7.63                                              |                                         |                                                                  | 0                         | 0.001                  | +                                           | 421000                     | 400                         |
| 83                  | 6.4                                               |                                         |                                                                  | 0                         | 0.001                  | +                                           | 526000                     | 400                         |
| 89                  | n.d.                                              |                                         |                                                                  | 0                         | 0.001                  | +                                           | 526000                     | 400                         |
| 95                  | n.d.                                              |                                         |                                                                  | 0                         | 0.001                  | +                                           | 526000                     | 400                         |
| 101                 | n.d.                                              |                                         |                                                                  | 0                         | 0                      | 0                                           | 526000                     | 400                         |

| Pt. 5               |                                                   | Levels of residual disease (%)          |                                     |                           |                        | Ph <sup>+</sup> cells detected by DNA Q-PCR | Total analyzed cell number | Therapy with Gleevec mg/day |
|---------------------|---------------------------------------------------|-----------------------------------------|-------------------------------------|---------------------------|------------------------|---------------------------------------------|----------------------------|-----------------------------|
| Follow-ups (Months) | White blood cell count (*10 <sup>9</sup> cells/L) | CBA                                     | FISH                                | BCR-ABL1/ABL1 mRNA % (IS) | Leukemic cells DNA (%) | Leukemic cells number                       |                            |                             |
| 0                   | 68.7                                              | 46,XY, t(9;22)(q34;q11) (20 metaphases) | positivity for t(9;22) (300 nuclei) | 100                       | 93                     | 195789                                      | 210000                     | 0                           |
| 13                  | 4.1                                               | normal (20 metaphases)                  | normal (300 nuclei/4 metaphases)    | 0.04                      | 0.007                  | 15                                          | 210000                     | 400                         |
| 19                  | 3.95                                              | normal (21 metaphases)                  | normal (300 nuclei/4 metaphases)    | 0.05                      | 0.012                  | 25                                          | 210000                     | 600                         |
| 35                  | 3.7                                               |                                         |                                     | 0.089                     | 0.001                  | +                                           | 315000                     | 600                         |
| 44                  | 3.37                                              |                                         |                                     | 0.09                      | 0.001                  | +                                           | 315000                     | 600                         |
| 51                  | 5.7                                               |                                         |                                     | 0                         | 0.005                  | 15                                          | 315000                     | 400                         |
| 57                  | 4.2                                               |                                         |                                     | 0                         | 0.001                  | +                                           | 315000                     | 400                         |
| 63                  | 3.7                                               |                                         |                                     | 0                         | 0.001                  | +                                           | 315000                     | 400                         |
| 70                  | 5.3                                               |                                         |                                     | 0                         | 0.013                  | 40                                          | 315000                     | 400                         |
| 75                  | 4.5                                               |                                         |                                     | 0                         | 0.001                  | +                                           | 315000                     | 400                         |
| 89                  | n.d.                                              |                                         |                                     | 0                         | 0.001                  | +                                           | 526000                     | 400                         |
| 95                  | n.d.                                              |                                         |                                     | 0                         | 0.001                  | +                                           | 526000                     | 400                         |

| Pt. 6               |                                                   | Levels of residual disease (%)          |                                     |                           |                        | Ph <sup>+</sup> cells detected by DNA Q-PCR |                            |                             |
|---------------------|---------------------------------------------------|-----------------------------------------|-------------------------------------|---------------------------|------------------------|---------------------------------------------|----------------------------|-----------------------------|
| Follow-ups (Months) | White blood cell count (*10 <sup>9</sup> cells/L) | CBA                                     | FISH                                | BCR-ABL1/ABL1 mRNA % (IS) | Leukemic cells DNA (%) | Leukemic cells number                       | Total analyzed cell number | Therapy with Gleevec mg/day |
| 0                   | n.d.                                              | 46,XY, t(9;22)(q34;q11) (20 metaphases) | positivity for t(9;22) (300 nuclei) | 100                       | 88.993                 | 187353                                      | 210000                     | 0                           |
| 4                   | 280                                               |                                         |                                     | 7.07                      | 4.575                  | 9632                                        | 210000                     | 400                         |
| 7                   | 4.9                                               | normal (20 metaphases)                  | normal (300 nuclei)                 | 1.45                      | 0.672                  | 1415                                        | 210000                     | 400                         |
| 13                  | 6.1                                               | normal (20 metaphases)                  | normal (300 nuclei)                 | 0.58                      | 0.418                  | 880                                         | 210000                     | 400                         |
| 16                  | 6.6                                               |                                         |                                     | 1.66                      | 0.032                  | 67                                          | 210000                     | 400                         |
| 19                  | 5.1                                               | normal (23 metaphases)                  | normal (300 nuclei/8 metaphases)    | 0.45                      | 0.045                  | 95                                          | 210000                     | 400                         |
| 22                  | 5.7                                               |                                         |                                     | 0.4                       | 0.068                  | 143                                         | 210000                     | 400                         |
| 25                  | 5.9                                               | normal (20 metaphases)                  | normal (300 nuclei/5 metaphases)    | 0.32                      | 0.024                  | 51                                          | 210000                     | 400                         |
| 37                  | 6.3                                               |                                         |                                     | 0.023                     | 0.006                  | 18                                          | 315000                     | 400                         |
| 51                  | 6.6                                               |                                         |                                     | 0                         | 0.001                  | +                                           | 421000                     | 400                         |
| 57                  | 7.4                                               |                                         |                                     | 0                         | 0.005                  | 17                                          | 315000                     | 400                         |
| 63                  | 4.7                                               |                                         |                                     | 0                         | 0.008                  | 24                                          | 315000                     | 400                         |
| 69                  | 9.8                                               |                                         |                                     | 0.003                     | 0.005                  | 17                                          | 315000                     | 400                         |
| 84                  | n.d.                                              |                                         |                                     | 0                         | 0.001                  | +                                           | 526000                     | 400                         |
| 90                  | n.d.                                              |                                         |                                     | 0                         | 0.006                  | 31                                          | 526000                     | 400                         |
| 94                  | n.d.                                              |                                         |                                     | N.E.                      | 0.001                  | +                                           | 526000                     | 400                         |
| 97                  | n.d.                                              |                                         |                                     | 0                         | 0.001                  | +                                           | 526000                     | 400                         |

| Pt. 7               |                                                   | Levels of residual disease (%)                         |                                     |                           |                        | Ph <sup>+</sup> cells detected by DNA Q-PCR |                            |                             |
|---------------------|---------------------------------------------------|--------------------------------------------------------|-------------------------------------|---------------------------|------------------------|---------------------------------------------|----------------------------|-----------------------------|
| Follow-ups (Months) | White blood cell count (*10 <sup>9</sup> cells/L) | CBA                                                    | FISH                                | BCR-ABL1/ABL1 mRNA % (IS) | Leukemic cells DNA (%) | Leukemic cells number                       | Total analyzed cell number | Therapy with Gleevec mg/day |
| 0                   | n.d.                                              | 46,XY, t(9;22)(q34;q11) (20 metaphases)                | positivity for t(9;22) (300 nuclei) | 102.999                   | 90.258                 | 190016                                      | 210000                     | 0                           |
| 3                   | 4.4                                               |                                                        |                                     | 0.634                     | 1.064                  | 2240                                        | 210000                     | 400                         |
| 6                   | n.d.                                              | t(9;22)(q34;q11) (1 metaphase); normal (21 metaphases) | normal (300 nuclei/10 metaphases)   | 0.071                     | 0.391                  | 823                                         | 210000                     | 400                         |
| 30                  | 6                                                 |                                                        |                                     | 0.04                      | 0.002                  | 5                                           | 280000                     | 400                         |
| 37                  | 6.7                                               |                                                        |                                     | 0                         | 0.001                  | +                                           | 280000                     | 400                         |
| 43                  | 6.92                                              |                                                        |                                     | 0.011                     | 0.001                  | +                                           | 666000                     | 400                         |
| 47                  | n.d.                                              |                                                        |                                     | 0                         | 0.001                  | +                                           | 280000                     | 400                         |

| Pt. 8               |                                                   |                                                        |                                                                      |                           | Levels of residual disease (%) |                       | Ph <sup>+</sup> cells detected by DNA Q-PCR |                             |  |
|---------------------|---------------------------------------------------|--------------------------------------------------------|----------------------------------------------------------------------|---------------------------|--------------------------------|-----------------------|---------------------------------------------|-----------------------------|--|
| Follow-ups (Months) | White blood cell count (*10 <sup>9</sup> cells/L) | CBA                                                    | FISH                                                                 | BCR-ABL1/ABL1 mRNA % (IS) | Leukemic cells DNA (%)         | Leukemic cells number | Total analyzed cell number                  | Therapy with Gleevec mg/day |  |
| 0                   | n.d.                                              | 46,XX, t(9;22)(q34;q11) (20 metaphases)                | positivity for t(9;22) (300 nuclei/20 metaphases)                    | 35.947                    | 84.079                         | 177008                | 210000                                      | 0                           |  |
| 3                   | 2.73                                              |                                                        |                                                                      | 12.48                     | 19.669                         | 41408                 | 210000                                      | 400                         |  |
| 6                   | 4.2                                               | normal (20 metaphases)                                 | normal (300 nuclei)                                                  | 7.77                      | 4.895                          | 10305                 | 210000                                      | 400                         |  |
| 12                  | 4.35                                              | t(9;22)(q34;q11) (1 metaphase); normal (22 metaphases) | positivity for t(9;22) (3 nuclei); normal (497 nuclei/20 metaphases) | 3.64                      | 3.401                          | 7160                  | 210000                                      | 400                         |  |
| 18                  | 3.74                                              | normal (21 metaphases)                                 | normal (350 nuclei/5 metaphases)                                     | 2.19                      | 1.478                          | 3112                  | 210000                                      | 600                         |  |
| 21                  | 4.06                                              |                                                        |                                                                      | 7.03                      | 3.567                          | 7509                  | 210000                                      | 600                         |  |
| 24                  | 4.12                                              | normal (21 metaphases)                                 | normal (400 nuclei/15 metaphases)                                    | 1.26                      | 0.855                          | 1800                  | 210000                                      | 600                         |  |
| 33                  | 4.55                                              |                                                        |                                                                      | 3.88                      | 1.026                          | 2160                  | 210000                                      | 600                         |  |
| 39                  | 4.58                                              |                                                        |                                                                      | 3.34                      | 0.527                          | 1664                  | 315000                                      | 600                         |  |
| 43                  | 4.38                                              | normal (20 metaphases)                                 | normal (300 nuclei/15 metaphases)                                    | 1.921                     | 0.597                          | 1884                  | 315000                                      | 600                         |  |
| 46                  | 3.79                                              |                                                        |                                                                      | 0.272                     | 0.583                          | 1841                  | 315000                                      | 600                         |  |
| 52                  | 4.59                                              |                                                        |                                                                      | 0.36                      | 0.377                          | 1190                  | 315000                                      | 600                         |  |
| 55                  | 4.9                                               |                                                        |                                                                      | 0.474                     | 0.590                          | 1864                  | 315000                                      | 600                         |  |
| 58                  | 5.64                                              |                                                        |                                                                      | 0.216                     | 0.742                          | 2345                  | 315000                                      | 600                         |  |
| 61                  | 5.6                                               |                                                        |                                                                      | 0.354                     | 0.429                          | 1353                  | 315000                                      | 600                         |  |
| 64                  | 4.83                                              |                                                        |                                                                      | 0.427                     | 0.453                          | 1431                  | 315000                                      | 600                         |  |
| 67                  | 4                                                 |                                                        |                                                                      | 0.703                     | 0.381                          | 1203                  | 315000                                      | 600                         |  |
| 70                  | 5.4                                               |                                                        |                                                                      | 0.087                     | 0.119                          | 376                   | 315000                                      | 600                         |  |
| 73                  | n.d.                                              |                                                        |                                                                      | 0.253                     | 0.098                          | 310                   | 315000                                      | 600                         |  |
| 79                  | 2.64                                              |                                                        |                                                                      | 0.452                     | 0.174                          | 551                   | 315000                                      | 400                         |  |
| 83                  | n.d.                                              |                                                        |                                                                      | 0.26                      | 0.235                          | 1235                  | 526000                                      | 400                         |  |
| 84                  | n.d.                                              |                                                        |                                                                      | 0.26                      | 0.068                          | 359                   | 526000                                      | 400                         |  |
| 86                  | n.d.                                              |                                                        |                                                                      | 0.495                     | 0.364                          | 1914                  | 526000                                      | 400                         |  |
| 89                  | n.d.                                              |                                                        |                                                                      | 0.61                      | 0.240                          | 1263                  | 526000                                      | 400                         |  |
| 91                  | n.d.                                              |                                                        |                                                                      | 0.551                     | 0.040                          | 208                   | 526000                                      | 400                         |  |
| 94                  | n.d.                                              |                                                        |                                                                      | 0.475                     | 0.233                          | 1224                  | 526000                                      | 400                         |  |

**Supplemental Table S2: Breakpoint features.** Breakpoints were positioned according to the reference sequence of chromosome 22 (NC\_000022) and chromosome 9 (NC\_000009).

| ID   | Breakpoint position |           |
|------|---------------------|-----------|
|      | Chr. 22             | Chr. 9    |
| 1    | 21962041            | 132640551 |
| 2    | 21962170            | 132568941 |
| 3    | 21962142            | 132584258 |
| 4    | 21962501            | 132709774 |
| 5    | 21962360            | 132580996 |
| 6    | 21961956            | 132580831 |
| 7    | 21961917            | 132580474 |
| 8    | 21962256            | 132604043 |
| K562 | 21962742            | 132596973 |



**Supplemental table S3: Primers and probe for the gDNA Q-PCR.**

| ID   |                                                                                                                                                        |
|------|--------------------------------------------------------------------------------------------------------------------------------------------------------|
| 1    | F 5'-CTGCTGCTGGGTGGTTGA-3'<br>Ph-R 5'-GGATTTTAGTCCTTACTTGTTTCCTATTTTCAC-3'<br>wt-R 5'-GCCAGATCCAAGGCACAGA-3'<br>Probe 6-FAM-AGATGCACGGCTTG-MGB         |
| 2    | F 5'-GCCCTCCTCTCCTCCAGCTA-3'<br>Ph-R 5'-AAGCCTCTGGCGTGTTC-3'<br>wt-R 5'-TGAGCATATGTGCAACAGTGAATG-3'<br>Probe 6-FAM-CACTTTTGGTCAAGCTG-MGB               |
| 3    | F 5'-TGCTCTGTGCCTTGGATCTG-3'<br>Ph-R 5'-TTCGGTGTAATAATCCTTCCATACTTT-3'<br>wt-R 5'-TGCAAAACAGCTTGACCAAAA-3'<br>Probe 6-FAM-CCCCACTCCCGTCCT-MGB          |
| 4    | F 5'-TTGTACCTGCCTCCCTTTC-3'<br>Ph-R 5'-TGAACCTCGACCTCAAGTGATCT-3'<br>wt-R 5'-GAGCCCCGGAGACTCATCA-3'<br>Probe 6-FAM-CGGGACAACAGAAGC-MGB                 |
| 5    | F 5'-CACTGGTTTGCCTGTATTGTGAA-3'<br>Ph-R 5'-GGACACACAGGGAACACTACTGC-3'<br>wt-R 5'-TGGGCCAAAAACATACTCATCA-3'<br>Probe 6-FAM-TCCTGAGATCCCC-MGB            |
| 6    | F 5'-TGGGACTAGTGGACTTTGGTTCA-3'<br>Ph-R 5'-GTGCATGATCATCACTAGTTAAAATGTAAA-3'<br>wt-R 5'-CTAACCCACCTTGTCCACTCCT-3'<br>Probe 6-FAM-ACAAGAGGCCCTAACAA-MGB |
| 7    | F 5'-CCCCCTCCTGTTAGCACTTT-3'<br>Ph-R 5'-GCTGCAACAGTACAAACAGTAACCC-3'<br>wt-R 5'-CCCTAACAAAGCATAGCTCTTGCTT-3'<br>Probe 6-FAM-ATGGGACTAGTGGACTTT-MGB     |
| 8    | F 5'-CACAGCATACGCTATGCACATGT-3'<br>Ph-R 5'-GGGAAAAAATGTTTTCTCCTTATATCG-3'<br>wt-R 5'-ATAAGGTTCCAAGCACAGCAGAG-3'<br>Probe 6-FAM-ACACACACCCACCC-MGB      |
| K562 | F 5'-TGACCACGGGACACCTTTG-3'<br>Ph-R 5'-TGGGTATGGAAGCTGATAAAACC-3'<br>Probe 6-FAM-CCCTGGCCGCTGTG-MGB                                                    |
